# Supplementary material for: EGFRvIII expression and isocitrate dehydrogenase mutations in patients with glioma
Source: PubMed Central journal article supplement — Oncol Lett. 2020 Oct 23;20(6):384. doi: 10.3892/ol.2020.12247 (PMC7656109; doi:10.3892/ol.2020.12247), 2020-10-23
Supplement: Supplementary_Data.pdf [file Supplementary_Data.pdf]

Figure S1. EGFRvIII and GAPDH amplification plots with various dilution of RNA concentrations. RNA 0.01  $\mu\text{g}$  (A) and 0.1  $\mu\text{g}$  (B) was used in reverse transcription reaction, then quantitative PCR was performed for EGFRvIII and GAPDH, respectively. EGFRv, epidermal growth factor receptor variant.

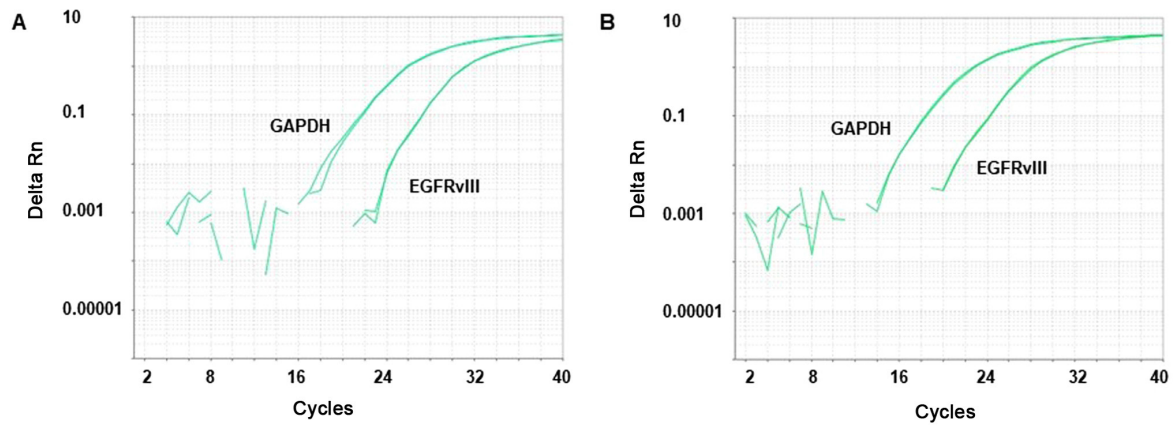

Figure S2. EGFRvIII and GAPDH amplification plots with various dilution of RNA concentrations. RNA 0.25  $\mu\text{g}$  (A) and 0.5  $\mu\text{g}$  (B) was used in reverse transcription reaction, then the quantitative PCR was performed for EGFRvIII and GAPDH, respectively. EGFRv, epidermal growth factor receptor variant.

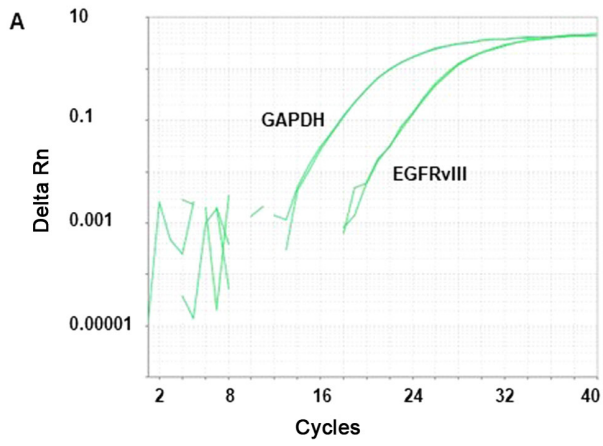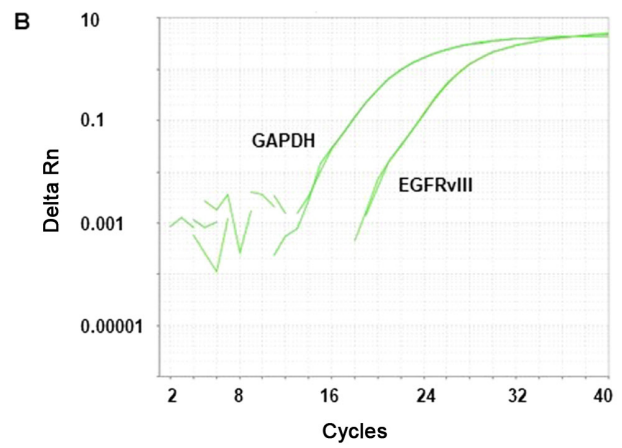

Figure S3. EGFRvIII and GAPDH amplification plots with RNA from positive control cells and K-562 cells RNA (negative control). (A) 1.0  $\mu\text{g}$  RNA from positive control cells, and in (B) 1.0  $\mu\text{g}$  RNA from K-562 cells (negative control) was used in reverse transcription reaction, then quantitative PCR was performed for EGFRvIII and GAPDH, respectively. EGFRv, epidermal growth factor receptor variant.

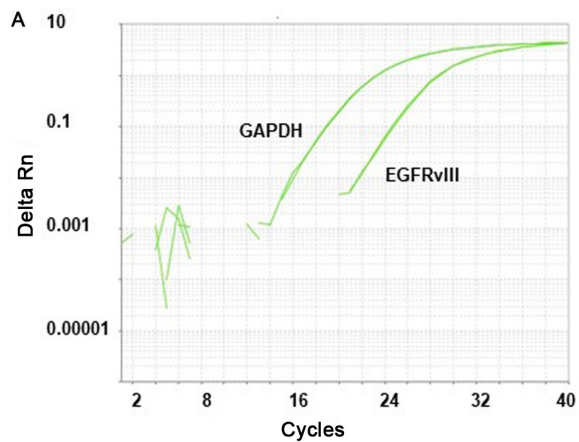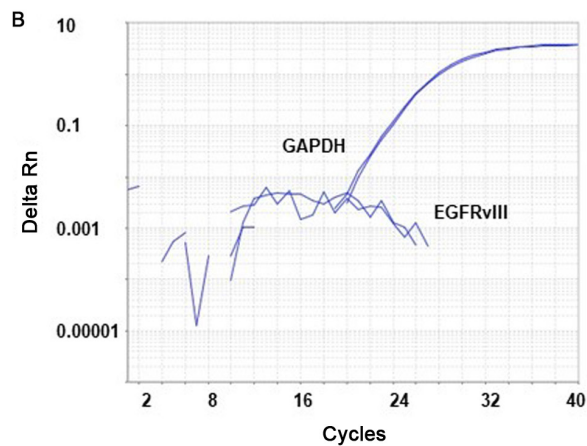

Figure S4. EGFRvIII and GAPDH amplification plots with DNA from (positive control cells) and DNA from (negative control cells). (A) 0.1  $\mu$ g DNA from positive control cells, and (B) 0.1  $\mu$ g DNA from negative control cells was directly used for quantitative PCR for EGFRvIII and GAPDH, respectively. EGFRv, epidermal growth factor receptor variant.

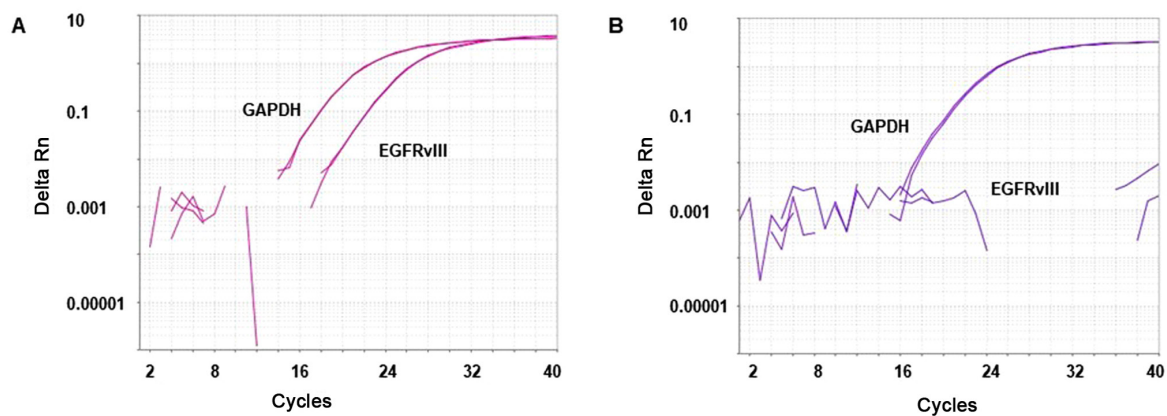

Figure S5. Verification EGFRvIII transcript by PCR using known positive and negative controls. PCR products of 238 bp (red arrow) are shown for positive samples (lanes 1-10) and in lanes 11-19 no EGFRvIII-specific PCR product formed by negative controls. The forward primer is a junctional primer spanning exons 1-8 (CAGTATTGATCGGGAGAGCC) and amplifies only the exon 2-7 deletion mutant of EGFR (EGFRvIII). Lane denoted as (M) is a DNA ladder. EGFRv, epidermal growth factor receptor variant.

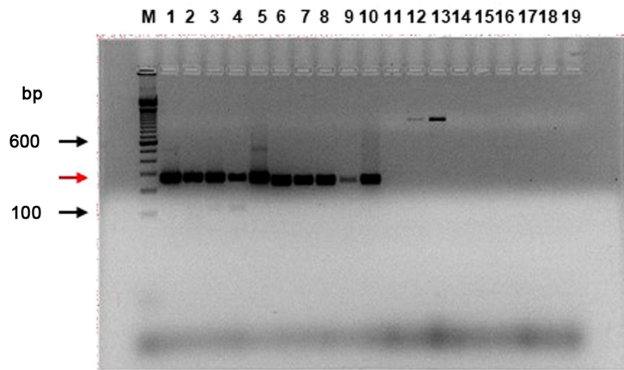

Table SI. Primers used for RT-qPCR and Sanger sequencing.

| Gene and primer name   | Primer sequence                                 | Product (bp) | Assay      |
|------------------------|-------------------------------------------------|--------------|------------|
| EGFRvIII (F)           | 5'-GGCTCTGGAGGAAAAGAAAGGTAATT-3'                | 96           | RT-qPCR    |
| EGFRvIII (R)           | 5'-CCGTCTTCCTCCATCTCATAGC-3'                    |              |            |
| EGFRvIII TaqMan-probe. | 6-FAM-5'-TGACAGATCACGGCTC-MGBNFQ-3'             | 217          | RT-qPCR    |
| GAPDH (F)              | 5'-GAAGGTGAAGGTCGGAGTC-3'                       |              |            |
| GAPDH (R)              | 5'-GATGGGATTTCCATTGATGAC-3'                     |              |            |
| GAPDH TaqMan-probe.    | VIC-5'-TCACCAGGGCTGCTT-MGBNFQ-3'                | 238          | Sequencing |
| EGFRvIII seq (F)       | 5'-CAGTATTGATCGGGAGAGCC-3'                      |              |            |
| EGFRvIII seq (R)       | 5'-GCCCTTCGCACTTCTTACAC-3'                      | 213          | Sequencing |
| IDH1 (F)               | 5'-TGAAAACGGCCAGTTGAGAAGAGGGTTGAGGAGTT-3'       |              |            |
| IDH1 (R)               | 5'-CAGGAAACAGCTATGACCAACATGCAAATCACATTATTGCC-3' | 288          | Sequencing |
| IDH2 (F)               | 5'-TGAAAACGGCCAGTGGGTTCAAATTCTGGTTGAA-3'        |              |            |
| IDH2 (R)               | 5'-CAGGAAACAGCTATGACCTAGGCGAGGAGCTCCAGT-3'      |              | Sequencing |
| M-13 (F)               | 5'-TGAAAACGGCCAGT-3'                            |              |            |
| M-13 (R)               | 5'-CAGGAAACAGCTATGACC-3'                        |              | Sequencing |

RT-qPCR, reverse transcription-quantitative PCR; F, forward; R, reverse; IDH, isocitrate dehydrogenase; EGFRv, epidermal growth factor receptor variant.

Table III. EGFRvIII Expression in GBM tumors of Saudi Arabian population.

| Lab code | Sex | Age, years | Diagnosis         | EGFRvIII RT-qPCR |
|----------|-----|------------|-------------------|------------------|
| 46-N     | F   | 38         | GBM grade-IV      | POS              |
| 47-N     | M   | 61         | GBM grade-IV      | NEG              |
| 51-N     | M   | 73         | GBM grade IV      | NEG              |
| 53-N     | M   | 57         | GBM grade-IV      | NEG              |
| 55-N     | F   | 30         | GBM grade-IV      | POS              |
| 56-?     | M   | 71         | GBM               | POS              |
| 59-N     | M   | 60         | GBM grade-IV      | POS              |
| 62-N     | M   | 62         | GBM Recurrent     | POS              |
| 63-N     | M   | 61         | GBM               | NEG              |
| 68-N     | F   | 40         | GBM grade-IV      | NEG              |
| 69-N     | F   | 32         | GBM grade-IV      | NEG              |
| 82-N     | M   | 69         | GBM grade-IV      | NEG              |
| HALK-2   | M   | 45         | GBM               | POS              |
| HALK-3   | M   | 56         | GBM               | POS              |
| HALK-4   | F   | 8          | Low grade glioma  | POS              |
| HALK-5   | F   | 37         | GBM               | NEG              |
| HALK-8   | M   | 37         | GBM               | POS              |
| HALK-9   | M   | 65         | GBM               | POS              |
| HALK-12  | M   | 17         | High grade glioma | POS              |
| HALK-16  | M   | 50         | GBM               | NEG              |
| HALK-17  | M   | 58         | GBM               | POS              |
| HALK-18  | F   | 35         | GBM               | NEG              |
| HALK-21  | F   | 30         | Favor GBM         | POS              |
| HALK-22  | M   | 49         | GBM               | POS              |
| HALK-23  | F   | 59         | GBM               | POS              |
| HALK-24  | M   | 60         | GBM               | NEG              |
| HALK-27  | M   | 59         | GBM               | POS              |
| HALK-29  | F   | 54         | GBM               | POS              |
| HALK-31  | F   | 64         | GBM               | POS              |
| HALK-32  | M   | 50         | GBM               | POS              |
| HALK-33  | M   | 43         | GBM               | POS              |
| HALK-34  | F   | 12         | GBM               | POS              |
| HALK-39  | M   | 45         | GBM               | POS              |
| HALK-40  | F   | 48         | Low grade glioma  | NEG              |
| HALK-41  | M   | 51         | GBM               | NEG              |
| HALK-47  | M   | 60         | GBM               | NEG              |
| HALK-48  | M   | 62         | GBM               | NEG              |
| KAMC-3   | M   | 48         | GBM               | POS              |
| KAMC-12  | F   | 26         | GBM               | NEG              |
| KAMC-15  | F   | 15         | GBM               | POS              |
| KAMC-17  | M   | 23         | GBM               | POS              |
| KAMC-18  | F   | 47         | Glioma            | NEG              |
| KAMC-19  | M   | 43         | Glioma            | NEG              |
| KAMC-20  | F   | 62         | Glioma            | NEG              |
| KAMC-22  | M   | 21         | GBM               | POS              |
| KAMC-25  | F   | 45         | Glioma            | NEG              |
| KAMC-26  | M   | 31         | GBM               | NEG              |
| KAMC-27  | M   | 35         | GBM               | NEG              |
| KAMC-34  | F   | 48         | GBM               | POS              |
| KAMC-35  | F   | 51         | GBM               | NEG              |
| KAMC-36  | F   | 26         | GBM               | NEG              |
| KAMC-40  | M   | 29         | GBM               | NEG              |
| KAMC-44  | M   | 50         | GBM               | NEG              |
| KAMC-47  | F   | 65         | GBM               | NEG              |
| KAMC-49  | F   | 58         | GBM               | POS              |

EGFRv, epidermal growth factor receptor variant; RT-qPCR, reverse transcription-quantitative PCR; GBM, glioblastoma; F, female; M, male; NEG, negative; POS, positive.

Table III. EGFRvIII expression in astrocytoma of Saudi Arabian population.

| Lab code | Sex | Age, years | Diagnosis                     | EGFRvIII RT-qPCR |
|----------|-----|------------|-------------------------------|------------------|
| 42-N     | F   | 4          | Pilocytic astrocytoma grade-I | NEG              |
| 71-N     | M   | 35         | Astrocytoma grade-II          | NEG              |
| 84-N     | M   | 9          | Pilocytic astrocytoma         | NEG              |
| 85-N     | M   | 8          | Pilocytic astrocytoma         | NEG              |
| 88-N     | F   | 12         | Pilocytic astrocytoma         | NEG              |
| HALK-7   | M   | 6          | Pilocytic astrocytoma         | NEG              |
| HALK-11  | M   | 1          | Diffuse astrocytoma           | POS              |
| HALK-13  | M   | 7          | Pilocytic astrocytoma         | NEG              |
| HALK-20  | F   | 11         | Pilocytic astrocytoma         | NEG              |
| HALK-28  | F   | 4          | Pilocytic astrocytoma         | NEG              |
| HALK-36  | M   | 13         | Pilocytic astrocytoma         | NEG              |
| HALK-37  | M   | 5          | Pilocytic astrocytoma         | NEG              |
| HALK-42  | F   | 4          | Pilocytic astrocytoma         | NEG              |
| KAMC-8   | M   | 56         | Astrocytoma                   | NEG              |
| KAMC-29  | M   | 15         | Astrocytoma                   | NEG              |
| KAMC-31  | M   | 28         | Astrocytoma                   | NEG              |
| KAMC-33  | M   | 36         | Pilocytic astrocytoma         | POS              |
| KAMC-37  | M   | 58         | Pilocytic astrocytoma         | POS              |
| KAMC-45  | M   | 50         | Anaplastic astrocytoma        | NEG              |
| KAMC-50  | F   | 9          | Astrocytoma                   | POS              |
| KAMC-51  | M   | 6          | Astrocytoma                   | POS              |
| KAMC-53  | M   | 12         | Anaplastic astrocytoma        | NEG              |

EGFRv, epidermal growth factor receptor variant; RT-qPCR, reverse transcription-quantitative PCR; F, female; M, male; NEG, negative; POS, positive.



Table SIV. EGFRvIII expression in oligodendroglioma tumors of Saudi Arabian population.

| Lab code | Sex | Age, years | Diagnosis                    | EGFRvIII RT-qPCR |
|----------|-----|------------|------------------------------|------------------|
| 50-N     | F   | 6          | Oligodendroglioma grade-II   | NEG              |
| HALK-6   | F   | 36         | Anaplastic oligodendroglioma | NEG              |
| HALK-10  | F   | 17         | Anaplastic oligodendroglioma | NEG              |
| HALK-14  | M   | 39         | Oligodendroglioma            | NEG              |
| HALK-15  | M   | 6          | Anaplastic oligodendroglioma | POS              |
| HALK-25  | F   | 25         | Oligodendroglioma            | POS              |
| HALK-30  | F   | 51         | Oligodendroglioma            | NEG              |
| HALK-35  | M   | 33         | Anaplastic oligodendroglioma | NEG              |
| HALK-44  | F   | 27         | Anaplastic oligodendroglioma | NEG              |
| KAMC-2   | M   | 67         | Oligodendroglioma            | NEG              |
| KAMC-16  | F   | 23         | Anaplastic oligodendroglioma | POS              |
| KAMC-41  | M   | 42         | Oligodendroglioma            | POS              |
| KAMC-46  | M   | 33         | Anaplastic oligodendroglioma | NEG              |

EGFRv, epidermal growth factor receptor variant; RT-qPCR, reverse transcription-quantitative PCR; F, female; M, male; NEG, negative; POS, positive.

Table SV. EGFRvIII expression in brain tumors of Saudi Arabian population.

| Lab code | Sex | Age, years | Diagnosis                       | EGFRvIII RT-qPCR |
|----------|-----|------------|---------------------------------|------------------|
| 9-N      | M   | 10         | Medulloblastoma                 | NEG              |
| 40-N     | F   | 59         | Meningioma grade-I              | NEG              |
| 43-N     | M   | 24         | Fibrillary astrocytoma grade-II | NEG              |
| 44-N     | F   | 3          | Choroid plex papilloma grade-II | NEG              |
| 45-N     | M   | 66         | Meningioma grade-II             | NEG              |
| 49-N     | M   | 35         | Craniopharyngioma               | NEG              |
| 52-N     | M   | 10         | Medulloblastoma grade-IV        | NEG              |
| 54-N     | F   | 14         | Medulloblastoma                 | POS              |
| 60-N     | F   | 2          | Rhabdoid tumor                  | NEG              |
| 61-N     | M   | 7          | Medulloblastoma                 | NEG              |
| 70-N     | F   | 3          | Ependymoma grade-I              | NEG              |
| 83-N     | M   | 25         | Ependymoma grade-II             | NEG              |
| 86-N     | M   | 50         | Synovial sarcoma                | NEG              |
| 87-N     | F   | 61         | Meningioma                      | NEG              |
| HALK-1   | F   | 18         | Ganglioglioma, atypical         | POS              |
| HALK-19  | F   | 40         | Gliosarcoma                     | NEG              |
| HALK-26  | F   | 16         | Ganglioglioma                   | NEG              |
| HALK-38  | F   | 27         | Ganglioglioma                   | NEG              |
| HALK-43  | F   | 25         | Ganglioglioma                   | NEG              |
| HALK-45  | F   | 38         | Gliosarcoma                     | NEG              |
| HALK-46  | M   | 32         | Ganglioglioma                   | NEG              |
| KAMC-1   | M   | 50         | Metastatic adenocarcinoma       | NEG              |
| KAMC-5   | M   | 55         | Hemangioblastoma                | NEG              |
| KAMC-9   | F   | 56         | Craniopharyngioma               | NEG              |
| KAMC-11  | F   | 60         | Reactive gliosis                | POS              |
| KAMC-21  | M   | 67         | Medulloblastoma                 | NEG              |
| KAMC-28  | F   | 39         | Ependymoma                      | POS              |
| KAMC-43  | M   | 87         | Gliosarcoma                     | NEG              |
| KAMC-48  | M   | 21         | Gemistocytic astrocytoma        | NEG              |

EGFRv, epidermal growth factor receptor variant; RT-qPCR, reverse transcription-quantitative PCR; F, female; M, male; NEG, negative; POS, positive.

Table SVI. Association between IDH1 and IDH2 mutations with EGFRvIII status in brain tumors.

| Serial number | Lab code             | Diagnosis                    | IDH1                                  | EGFRvIII |
|---------------|----------------------|------------------------------|---------------------------------------|----------|
| 1             | HALK-27              | GBM                          | c.395G>A; p. (Arg132His)              | POS      |
| 2             | KAMC-12              | GBM                          | c.395G>A; p. (Arg132His)              | POS      |
| 3             | 63-N                 | GBM                          | c.352C>T; p. (Pro118Ser)              | NEG      |
| 4             | 47-N                 | GBM grade-IV                 | c.356G>A; p. (Arg119Gln)              | NEG      |
| 5             | 51-N                 | GBM grade-IV                 | c.315C>T; p. (Gly105Gly)              | NEG      |
| 6             | KAMC-47              | GBM                          | c.395G>A; p. (Arg132His)              | NEG      |
| 7             | HALK-41              | GBM                          | c.395G>A; p. (Arg132His)              | NEG      |
| 8             | HALK-48              | GBM                          | c.395G>A; p. (Arg132His)              | NEG      |
| 9             | HALK-39              | Low grade glioma             | c.369A>G; p. (Gly123Gly) <sup>c</sup> | POS      |
| 10            | KAMC-27              | GBM                          | c.395G>A; p. (Arg132His)              | NEG      |
| 11            | KAMC-15 <sup>b</sup> | GBM                          | c.395G>A; p. (Arg132His)              | POS      |
| 12            | KAMC-20 <sup>b</sup> | Glioma                       | c.395G>A; p. (Arg132His)              | NEG      |
| 13            | KAMC-44 <sup>b</sup> | GBM                          | c.395G>A; p. (Arg132His)              | NEG      |
| 14            | 62-N                 | GBM                          | c.395G>A; p. (Arg132His)              | POS      |
| 15            | 50-N                 | Oligodendroglioma grade II   | c.395G>A; p. (Arg132His)              | NEG      |
| 16            | HALK-10              | Anaplastic Oligodendroglioma | c.395G>A; p. (Arg132His)              | NEG      |
| 17            | HALK-25              | Oligodendroglioma            | c.395G>A; p. (Arg132His)              | POS      |
| 18            | HALK-30              | Oligodendroglioma            | c.395G>A; p. (Arg132His)              | NEG      |
| 19            | HALK-44              | Anaplastic oligodendroglioma | c.395G>A; p. (Arg132His)              | NEG      |
| 20            | KAMC-41              | Oligodendroglioma            | c.395G>A; p. (Arg132His)              | POS      |
| 21            | KAMC-2               | Oligodendroglioma            | c.395G>A; p. (Arg132His)              | NEG      |
| 22            | HALK-35              | Anaplastic oligodendroglioma | c.395G>A; p. (Arg132His)              | NEG      |
| 23            | HALK-11              | Diffuse astrocytoma          | c.395G>A; p. (Arg132His)              | POS      |
| 24            | KAMC-33              | Pilocytic astrocytoma        | c.395G>A; p. (Arg132His)              | POS      |
| 25            | KAMC-37              | Pilocytic astrocytoma        | c.395G>A; p. (Arg132His)              | POS      |
| 26            | KAMC-50              | Astrocytoma                  | c.395G>A; p. (Arg132His)              | POS      |
| 27            | KAMC-51              | Astrocytoma                  | c.395G>A; p. (Arg132His)              | POS      |
| 28            | 71-N <sup>b</sup>    | Astrocytoma grade-II         | c.395G>A; p. (Arg132His)              | NEG      |
| 29            | 49-N                 | Craniopharyngioma            | c.472C>T; p. (Pro158Ser) <sup>a</sup> | NEG      |
| 30            | KAMC-28              | Ependymoma grade-II          | c.395G>A; p. (Arg132His)              | POS      |
| 31            | 83-N                 | Ependymoma grade-II          | c.395G>A; p. (Arg132His)              | NEG      |
| 32            | HALK-19              | Gliosarcoma                  | c.395G>A; p. (Arg132His)              | NEG      |
| 33            | 61-N <sup>b</sup>    | Medulloblastoma              | c.315C>T; p. (Gly105Gly)              | NEG      |
| 34            | 54-N                 | Medulloblastoma              | c.380C>T; p. (Pro127Leu)              | POS      |
| 35            | HALK-46              | Ganglioglioma                | c.395G>A; p. (Arg132His)              | NEG      |
| 36            | HALK-45              | Gliosarcoma                  | c.395G>A; p. (Arg132His)              | NEG      |

<sup>a</sup>Novel IDH2 mutation; <sup>b</sup>these tumors also contain IDH2 mutations; <sup>c</sup>novel IDH1 mutation. EGFRv, epidermal growth factor receptor variant; RT-qPCR, reverse transcription-quantitative PCR; F, female; M, male; GBM, glioblastoma; NEG, negative; POS, positive.
